# Supplementary material for: Evaluating genetic drift in time-series evolutionary analysis
Source: PubMed Central journal article supplement (PMC5703635; doi:10.1016/j.jtbi.2017.09.021), 2018-01-21
Supplement: mmc1.pdf [file mmc1.pdf]

1 **Supporting Information**

2 **Appendix A. Validation of optimization method through log-likelihood**  
3 **differences**

4 The likelihood model outlined in the Methods section was initially val-  
5 idated by testing the relative performance of each of the drift models on  
6 simulated data generated by exact Wright-Fisher propagation and standard  
7 Gaussian diffusion (Fig. [A.1](#)).

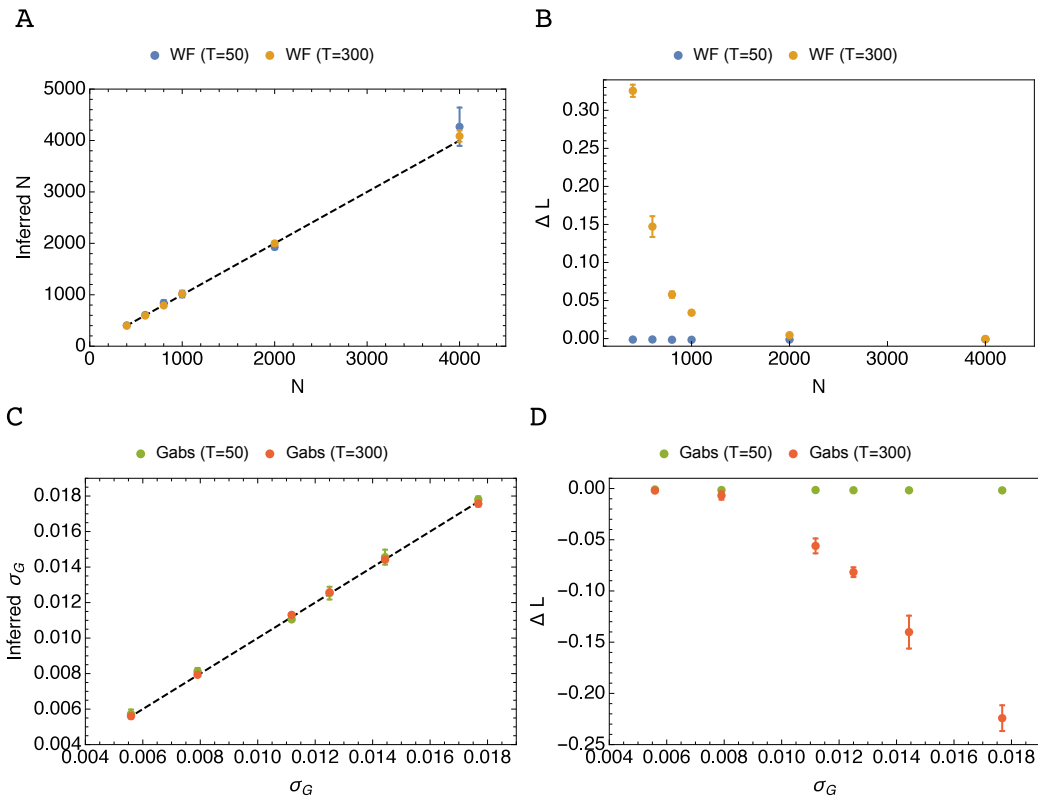

Figure A.1: **Estimates of drift parameter and respective performance with length of evolutionary trajectories ( $T$ ).** (A) Inferred  $N$  and (B) Average relative performance  $\Delta L = L_{WF} - L_{G_{abs}}$  per locus when simulated data is generated by traditional Wright-Fisher exact propagation. (C) and (D) equivalent calculations when simulated data is generated by traditional Gaussian propagation. For all figures sequencing coverage depth  $C = 100$ , sampling period  $\Delta t = 10$ , grid size 400, starting frequency  $q(0) = 0.5$  and number of loci  $L = 2000$ .

8 Overall, Fig. A.1 proves that there is no bias in our log-likelihood opti-  
 9 mization method; when data is generated with either a Wright-Fisher or a  
 10 Gaussian model, correct model identification is achieved.

11 **Appendix B. An increased quantity of data improves the infer-**  
 12 **ence of population sizes**

13 For the Wright-Fisher model, the dispersion of estimates across replicates  
 14 is larger for larger population sizes due to poor conditioning at these mag-  
 15 nitudes, which arises from the variance characteristic of the Wright-Fisher  
 16 process being of order  $O(\frac{1}{N})$  (see Eq. E.7). This effect and, consequently, the  
 17 total error in the inferred values decreases with the number of loci used in  
 18 the estimates (see Fig. B.2).

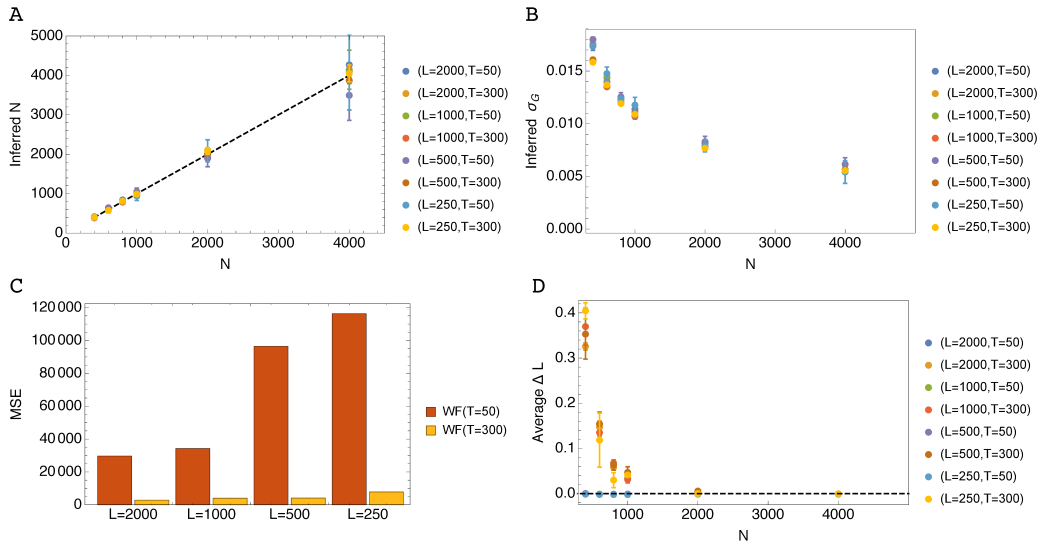

Figure B.2: **Estimates of population size  $N$  and respective performance by length of evolutionary trajectories ( $T$ ), and size of genomes  $L$ , for the Wright-Fisher ( $WF$ ) drift model, when simulated data is generated by traditional Wright-Fisher propagation.** (A) Inferred  $N$  and (B) Inferred  $\sigma_G$  vs simulated  $N$  for  $T=50$  and 300 generations. (C) Mean-square error between simulated and inferred  $N$ . (D) Average performance  $\Delta L = L_{WF} - L_{G_{abs}}$  per locus. For all figures sequencing coverage depth  $C = 100$ , sampling period  $\Delta t = 10$ , grid size 400 and starting frequency  $q(0) = 0.5$ . Error bars are calculated across three replicate calculations.

19 The results reported in Fig. B.2 correspond to simulated data where no  
 20 selection, mutation or linkage is assumed. Each trajectory is independent.

21 **Appendix C. Sampling factors affecting the correct inference of**  
 22 **Wright-Fisher model parameters**

23 Calculations shown in Fig. 2 of the main text were repeated for differ-  
 24 ent values of  $N$ , sampling frequency  $\Delta t$  and sampling depth  $C$ . In each  
 25 case model inference was performed for simulated Wright-Fisher trajectories  
 26 at 2000 loci, of length 300 generations, and starting frequency  $q(0) = 0.5$ .  
 27 Greater discrimination between models (observed via an increased likelihood  
 28 for the Wright-Fisher model) was possible given denser sampling of trajec-  
 29 tories, and increased sampling depth, as was also clear from observing the  
 30 threshold curves' order represented in Fig.2 of the main text. Mean likelihood  
 31 differences per trajectory and sampling instant are reported in Figure C.3.

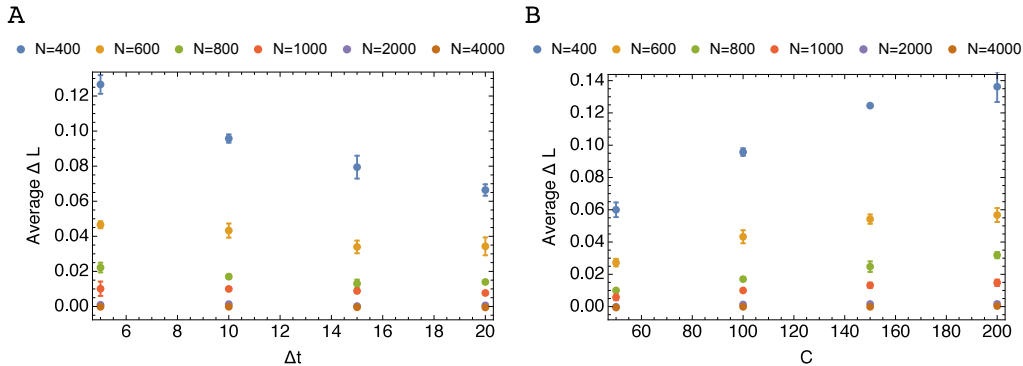

Figure C.3: **Average performance per locus per sampling instant with sampling period ( $\Delta t$ ) and sequence coverage depth ( $C$ ).** (A) Average  $\Delta L$  by  $\Delta t$  with  $C = 100$ . (B) Average  $\Delta L$  by  $C$  with sampling period  $\Delta t = 10$ . For both  $T = 300$ .

32 It was expected that trajectory length ( $T$ ), population size ( $N$ ) and se-

33 quencing depth ( $C$ ) would contribute considerably to model identifiability  
34 as these parameters have been previously tested in the context of inference  
35 of selection [1, 2]. Sampling period ( $\Delta t$ ), on the other hand, has not been  
36 as extensively explored in the literature of evolutionary time-series analysis,  
37 although the importance of having several time-points in conjunction with  
38 replicated trajectories is agreed to be fundamental in order to distinguish  
39 between selection and drift in relatively small populations [3]. Recently, it  
40 was reported that for Markov chains such as that represented by the Wright-  
41 Fisher process, two observations may not determine entirely the behaviour of  
42 the stochastic paths at all intermediate instances [4], unless the time between  
43 these observations is below a characteristic value. This finding is in close  
44 proximity to the importance of sampling frequency determined here and, in  
45 addition, to the distribution of sampling instances across the duration of  
46 the experiment. Outside evolutionary time-series analysis, the importance of  
47 how sparse the collection of information is performed has also been proven to  
48 be fundamental in correctly inferring parameters of an underlying diffusion  
49 process [5].

## 50 **Appendix D. Effect of additional evolutionary parameters on drift** 51 **model identification**

### 52 *Appendix D.1. Natural selection*

53 The presence of selection in the simulated data increases the variance of  
54 the observed allele frequencies by introducing a systematic deviation from the  
55 mean (see recurrence relations in Eqs. D.1 and D.2) [6]. Yet, it is decreased  
56 with respect to the neutral case (Eq. E.7) if each locus is taken independently.

57 As was mentioned in the Methods section, the simulated data with natural  
58 selection was generated with each locus having a random value in the interval  
59  $[-0.01, 0.01]$ . Under these circumstances, there is a low probability of gener-  
60 ating trajectories that, as a group, have a systematic direction towards one  
61 of the frequency boundaries. Therefore, if all of the loci are taken together in  
62 order to estimate the drift parameter, the observed variance is increased in  
63 proportion to the maximum deviation exerted by the combined changes. This  
64 additional dispersion in the bulk of trajectories led to an under-estimation  
65 of parameters in our neutral likelihood model (Eq. E.1, without the interme-  
66 diate pool as was used for the experimental data extracted from [7]), with  
67 estimates decreasing proportionally with an increase in the number of loci at  
68 which selection acted.

$$E_{WF}^H[q(t_k)] \approx \frac{(1+s)E_{WF}^H[q(t_{k-1})]}{1+sE_{WF}^H[q(t_{k-1})]} \quad (\text{D.1})$$

$$\begin{aligned} Var_{WF}^H(t_k) \approx & \frac{E_{WF}^H[q(t_k)](1-E_{WF}^H(q(t_k)))}{2N} \\ & + \left[ \frac{(1+s)}{[1+sE_{WF}^H[q(t_{k-1})]]^2} \right]^2 Var_{WF}^H[q(t_{k-1})] \end{aligned} \quad (\text{D.2})$$

69 As the contribution of selection has a frequency-dependent character  
70 (Eqs. D.1 and D.2), correct identification was not compromised under our  
71 likelihood model, an advantage in favour of the Wright-Fisher model being  
72 inferred in cases where frequency dynamics were observed for sufficient time  
73 (Figure D.4). For shorter trajectories, the models tested are indistinguish-  
74 able.

75 We must emphasize that we consider selection in the present work as a  
 76 perturbation to the drift models. For larger selection magnitudes, modelling  
 77 through a drift-only paradigm is not sufficient; the variance has to be adapted  
 78 accordingly (see Eqs. D.2) and the relative influence of drift and selection  
 79 depends on the frequency region a system is at a particular generation [8, 9,  
 80 10].

81 With respect to the compound nature of the likelihood model used through-  
 82 out our work, we must also highlight that although finite sampling effects led  
 83 to the Gaussian drift model also having a frequency dependent observed vari-  
 84 ance (see Eq. E.8, without the intermediate pool), this does not seem to in-  
 85 terfere with correct model selection, as higher moments become crucial when  
 86 the probability density approaches the boundaries, in longer trajectories.

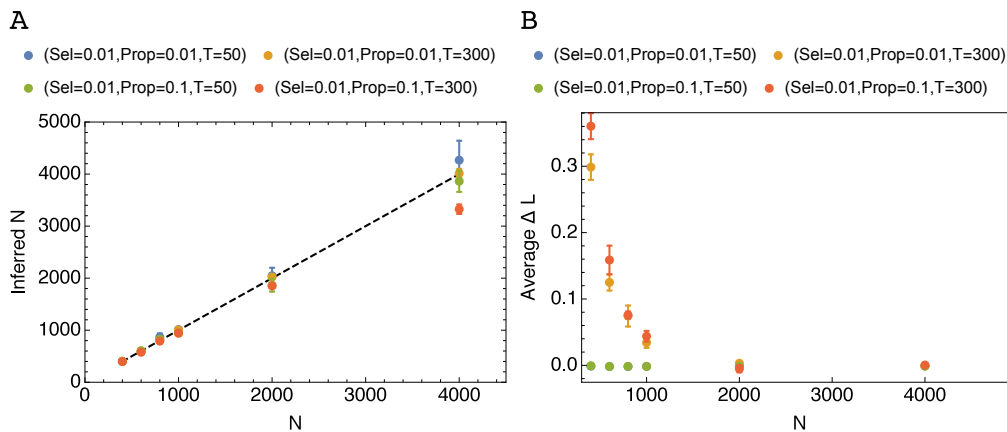

Figure D.4: **Estimates of drift parameter and respective performance with length of evolutionary trajectories ( $T$ ), when simulated data is generated by traditional Wright-Fisher propagation with selection.** (A) Inferred  $N$  vs simulated  $N$ , for 300 generations, for several selection strengths and proportion of loci under selection for  $q(0) = 0.5$ ,  $C = 100$  and  $\Delta t = 10$ . (B) Average performance  $\Delta L = L_{WF} - L_{G_{abs}}$  per locus corresponding to (A).

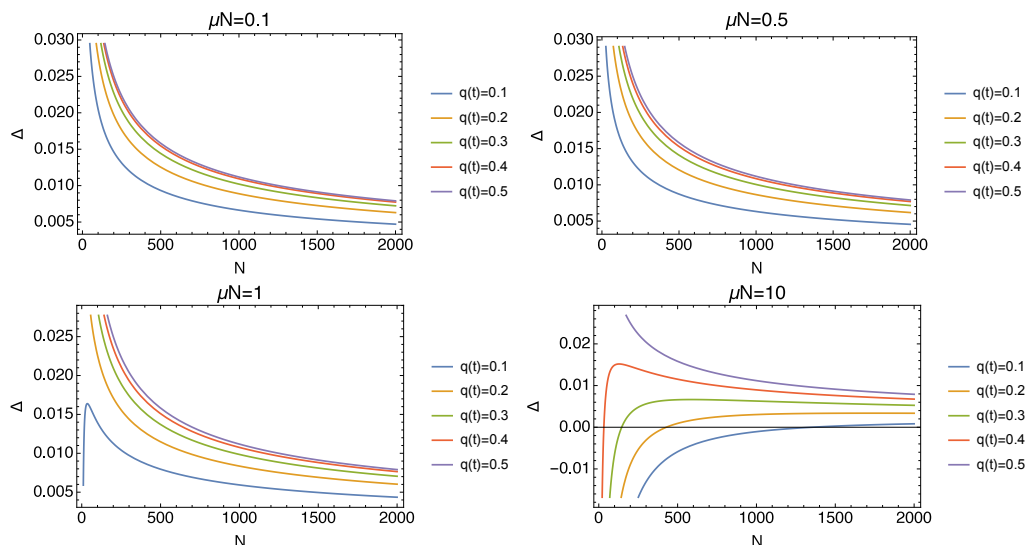

Figure D.5: **Difference in contributions between drift and mutation with population size  $N$ .**  $\Delta = \sqrt{\text{Var}_{WF}^H(t_k) - |E_{WF}^H[q(t_k)] - E_{WF}^H[q(t_{k-1})]|}$  assuming that  $\text{Var}_{WF}^H(t_{k-1}) = 0$ . Interpretation of terms according to a diffusion approximation to the Wright-Fisher model with mutation [8].

88 As we are assuming a one locus case for our drift model, mutation is  
 89 easily understood by investigating the transition observed for the frequency  
 90 stationary distributions as  $\mu N$  is changed [8]. Recalling the diffusion approx-  
 91 imation to the Wright-Fisher model [8], for values of  $\mu N$  below a threshold in  
 92 the vicinity of 0.5, a transition ensues where the frequency boundaries occur  
 93 with high probability and the predicted stationary distribution is roughly  
 94 U-shaped [8]. Above that threshold the most probable value is  $q(t) = 0.5$ , at  
 95 a particular instant  $t$ , and the distribution is bell-shaped [8].

96 In fact, the contributions of drift and mutation to the overall distribution



97 can also be understood via recurrence relationship for the mean and the  
 98 variance of the Wright-Fisher process with mutation included, as we did  
 99 above. For large  $\mu N$ , the contribution of the mutation mostly supersedes  
 100 the drift term (see Fig. D.5). Only in the region close to  $q(0) = 0.5$  is the  
 101 contribution of the drift term sufficient to overcome the overall tendency  
 102 imposed by mutation. For lower values of  $\mu N$ , the variance dominates

$$E_{WF}^H[q(t_k)] = E_{WF}^H[q(t_{k-1})] + \mu \left[ 1 - 2E_{WF}^H[q(t_{k-1})] \right] \quad (\text{D.3})$$

$$\begin{aligned}
 \text{Var}_{WF}^H(t_k) &= \frac{E_{WF}^H[q(t_k)](1 - E_{WF}^H(q(t_k)))}{2N} \\
 &+ (1 - 2\mu)^2 \left[ 1 - \frac{1}{2N} \right] \text{Var}_{WF}^H[q(t_{k-1})]
 \end{aligned} \quad (\text{D.4})$$

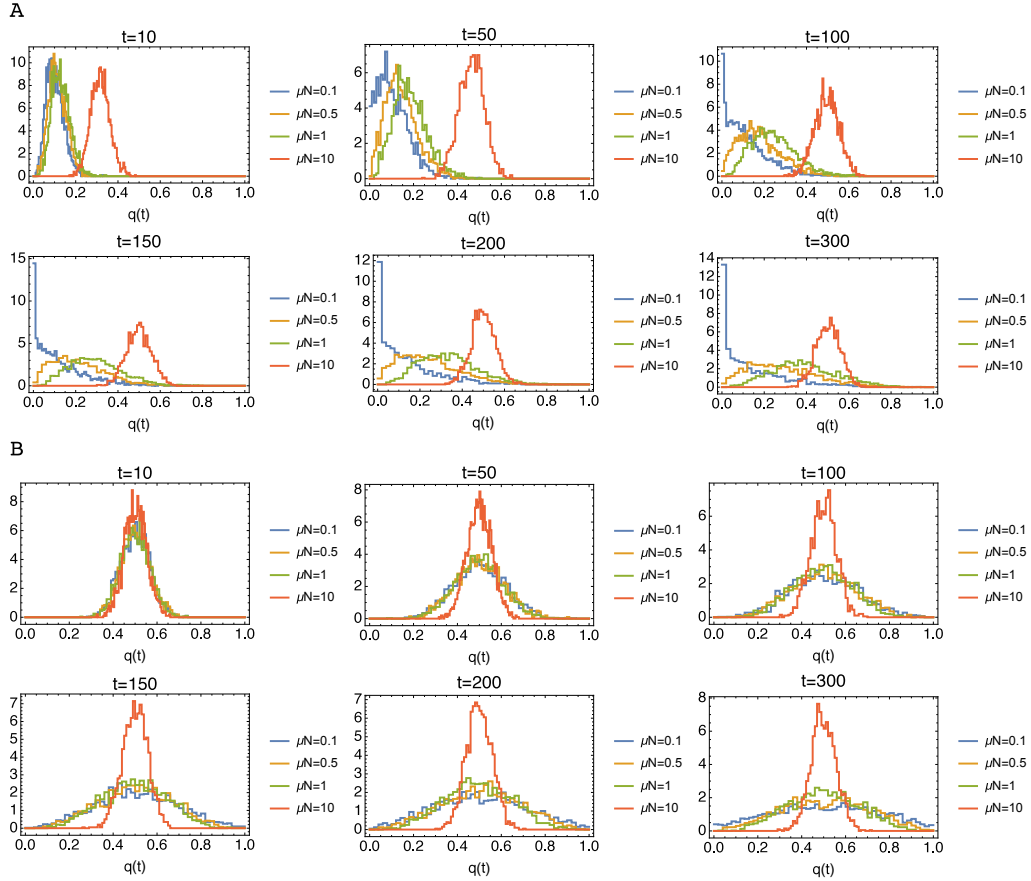

Figure D.6: **Time-dependent hidden probability density from simulated data as a function of  $\mu N$ .** (A)  $q(0) = 0.1$ . (B)  $q(0) = 0.5$ . For both  $N = 500$ .

103 By propagating populations under mutation throughout the duration of  
 104 the experiment, we are increasing the proportion of loci distributed around  
 105 the frequency value  $q(t) = 0.5$ , either when starting at  $q(t) = 0.5$  or  $q(t) = 0.1$   
 106 (Fig. D.6). Consequently, mutation diminishes the potential for correct  
 107 model identification in sufficiently long experiments, when the transient initial  
 108 period is much smaller than the total duration of the experiment. In

109 fact, for high values of  $\mu N$ , a Gaussian distribution may, in fact, without  
110 considering any extra parameters besides drift in our likelihood model (see  
111 Eq. E.1), be identified as the best model describing the observed time-series  
112 (Fig. D.7). The opposing forces of drift and mutation may be modelled more  
113 accurately by a Gaussian model when  $\mu N$  is larger due to the fact that the  
114 mutation term in this case is dominant. Also, if the starting frequency is  
115  $q(0) = 0.1$ , the mutation term induces a systematic movement of the mean  
116 towards a frequency of 0.5 which, since the Gaussian model variance is linear  
117 with time (see for example Eq. E.5, without the intermediate pool), con-  
118 tributes to its success in modelling the linear character of the general trend  
119 enforced by mutation.

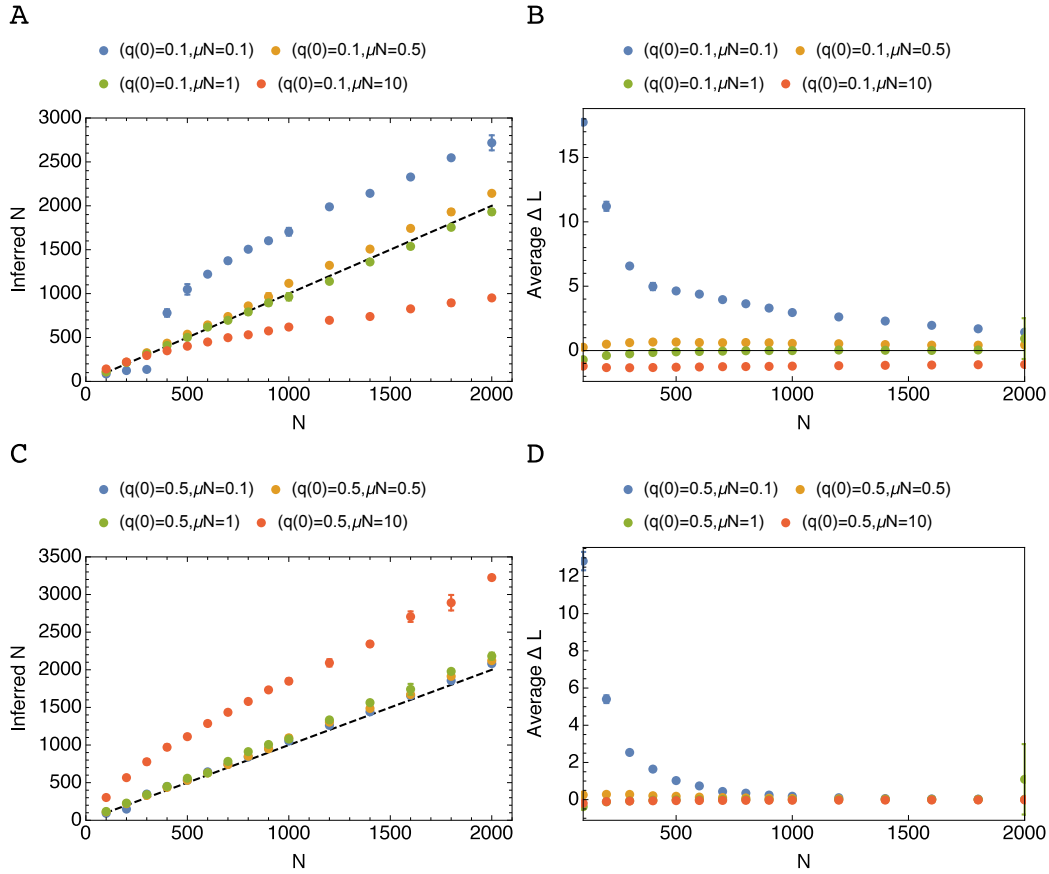

Figure D.7: **Estimates of drift parameter and respective performance with population size ( $N$ ), when simulated data is generated by traditional Wright-Fisher propagation with mutation.** (A) Inferred  $N$  vs simulated  $N$  for several mutation strengths measured by  $\mu N$  with  $q(0) = 0.1$ . (B) Average performance  $\Delta L = L_{WF} - L_{G_{abs}}$  per locus corresponding to (A). (C) and (D) similar to (A) and (B), respectively, but for  $q(0) = 0.5$ . For both  $T = 300$ ,  $C = 100$  and  $\Delta t = 10$ .

120 Although we tested the influence of  $\mu N$  on drift model inference, mutation  
 121 rates operating in experimental evolution in *Drosophila* are unlikely to cause  
 122 any observed mutations to take place during the duration of the experiment.  
 123 If we consider biologically plausible mutation rates present in *E&R* studies,

124 e.g.  $\mu \approx 10^{-9}/bp/gen$  [11],  $\mu N$  will become much smaller than 1, even  
125 for populations of order of  $\approx 10^6$  [11], leading to the most likely number  
126 of mutations appearing at each generation being zero, at least according  
127 to a Poisson model. This renders the contribution from mutation terms  
128 insignificant (see for example in Fig. D.5 the trend observed from  $\mu N = 10$   
129 to  $\mu N = 0.1$ ). Consequently, in this scenario the drift parameter estimates  
130 are expected to be slightly over-estimated, if at all.

### 131 *Appendix D.3. Linkage disequilibrium*

132 Linkage disequilibrium has been proven to be a confounding factor for  
133 identification of selection acting on single loci. As such, one might expect  
134 the noise signatures characteristic of each of the drift models tested in our  
135 work to be muddled. Despite the fact that over-estimation of population  
136 size was observed across all cases, correct drift model identification is still  
137 achieved (see Fig. D.8).

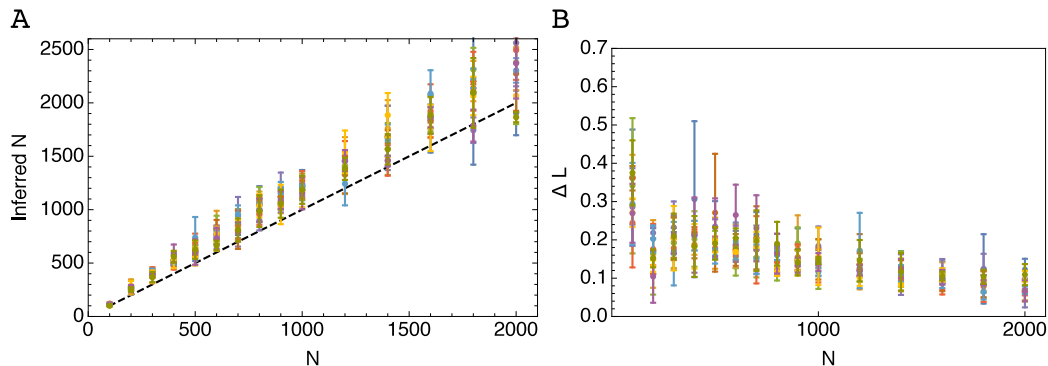

Figure D.8: **Estimates of drift parameter and respective performance with population size ( $N$ ), when simulated data is generated by traditional Wright-Fisher propagation of founding genomes with linkage disequilibrium characteristic of *Drosophila*.** (A) Inferred  $N$  vs simulated  $N$  for several mutation strengths measured by  $\mu N$  with  $q(0) = 0.1$ . (B) Average performance  $\Delta L = L_{WF} - L_{G_{obs}}$  per locus corresponding to (A).  $T = 300$ ,  $C = 100$  and  $\Delta t = 10$ . Error bars represent dispersion among replicates. Each color is associated with different examples generated by a coalescent neutral model. See Methods section for details on generated genomes.

138 **Appendix E. Alternative measures for evaluating evolutionary time-**  
 139 **series data**

140 *Appendix E.1. Combined forward-backward/predict-update posterior and goodness-*  
 141 *of-fit calculation*

142 In addition to the computation of the likelihood we also resorted to an-  
 143 other statistic, the goodness-of-fit (*GOF*), taking into account the posterior  
 144 for each locus frequency at each time-point resulting from the combined  
 145 forward-backward/predict-update optimization algorithm presented in the  
 146 Methods section.

147

148 As was outlined in the main text, the likelihood function arising from  
 149 optimization algorithm is

$$\mathcal{L}(\theta|D) = \sum_{i=1}^L \sum_k \log \int dq_i(t_k) P(D_i(t_k)|q_i(t_k)) P(q_i(t_k)|D_i(t_{1:k-1}), \theta) \quad (\text{E.1})$$

150 .

151 Effectively,  $P(q_i(t_k)|D_i(1:t_{k-1}), \theta)$ , can be determined in an initial step,  
 152 referred here as the predict step, where we take the data into account. The  
 153 emission model  $P(D_i(t_k)|q_i(t_k))$  is a compound of binomial distributions as  
 154 was clarified in the Main Text.

155

156 The backward computation is analogous to the forward step described  
 157 above and the combined forward-backward/predict-update posterior distri-  
 158 bution for each locus can be computed by averaging according to Eq. E.2,  
 159 thus allowing for all of the data to be taken into account, from the initial  
 160 sampling instant up to the last at  $t_k = T$  .

$$P(q_i(t_k)|D_i(t_1:T), \theta) = \frac{P(q_i(t_k)|D_i(t_1:t_k))P(q_i(t_k)|D_i(t_{k+1}:T))}{\int dq_i(t_k) P(q_i(t_k)|D_i(t_1:t_k))P(q_i(t_k)|D_i(t_{k+1}:T))} \quad (\text{E.2})$$

161 The posterior corresponding to the maximum likelihood estimate can ul-  
 162 timately be used to calculate an additional statistic commonly referred to as  
 163 Goodness-of-Fit (*GOF*), see Eq. E.3.

$$\mathcal{GOF}(\theta|D) = \sum_{i=1}^L \sum_k \log \int dq_i(t_k) (q_i(t_k) - q_i^D(t_k))^2 P(q_i(t_k)|D_i(t_1:T), \theta) \quad (\text{E.3})$$

164 Eq. [E.3](#) allows us to compute the error, across all loci and sampling in-  
165 stants, in the position of the posterior distribution with respect to the actual  
166 data.

167

168 *Appendix E.2. Drift model identification according to goodness-of-fit applied*  
169 *to experimental data*

170 In agreement with the likelihood calculation of the main text, GOF statis-  
171 tics calculated for the experimental data showed a closer fit to the data for  
172 the Wright-Fisher, as opposed to the Gaussian model (Figure [E.9](#)).



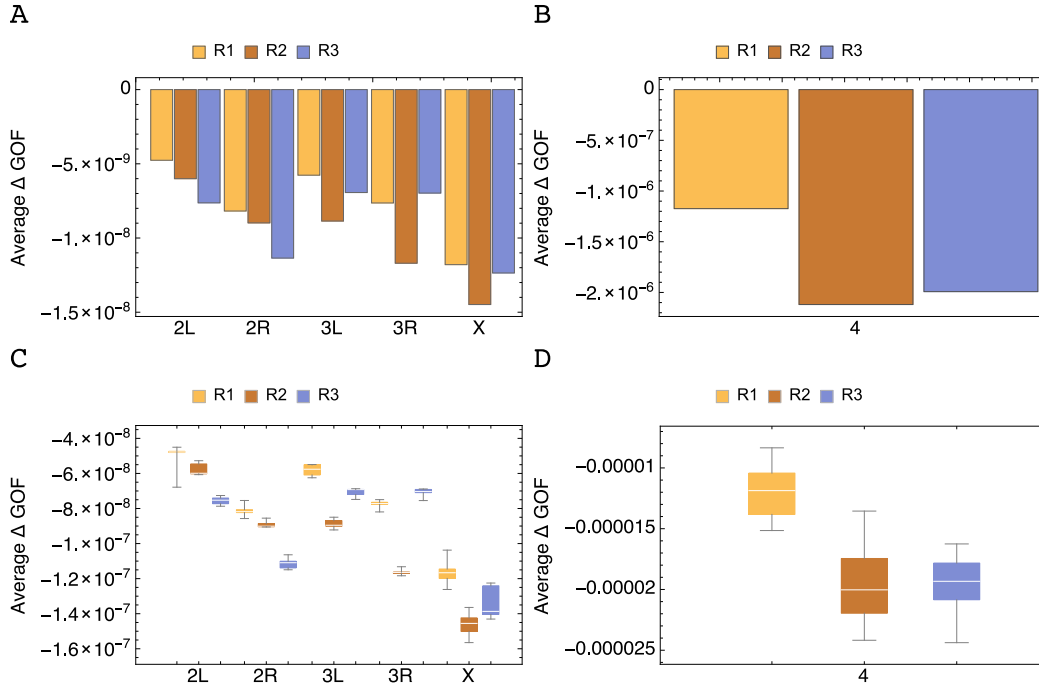

Figure E.9: **Goodness-of-fit difference per locus between exact Wright-Fisher and Gaussian propagation models applied to each each replicate of each chromosome reported in [7].** (C) and (D) correspond to the results on samples generated by bootstrapping (see Methods in Main Text).

173 *Appendix E.3. Estimation of variance across the frequency spectrum*

174 We note that, given finite sampling, the Gaussian noise model, in com-  
 175 mon with the Wright-Fisher model, exhibits frequency-dependent compound  
 176 variance.

177

178 Ignoring the effect of the absorbing boundaries, the inherent variance  
 179 of the Gaussian drift model is frequency-independent and increases linearly  
 180 with time, as can be derived by applying the law of total expectation and

181 total variance:

$$Var_G^H(t_k) = \sigma^2 t_k \quad (\text{E.4})$$

182 while the inherent expectation is constant

$$E_G^H(t_k) = E_G^H(t_{k-1}) = q(0) \quad (\text{E.5})$$

183 A similar calculation for the Wright-Fisher drift model shows the expected  
184 frequency-dependent variance at each sampling time as:

$$E_{WF}^H[q(t_k)] = q(0) \quad (\text{E.6})$$

$$Var_{WF}^H[q(t_k)] = q(0)(1 - q(0)) \left[1 - \left(1 - \frac{1}{2N}\right)^{t_k}\right] \quad (\text{E.7})$$

185 Applying once again the law of total expectation and variance for the  
186 sampling step we can obtain variances of the compound sampling problem,  
187 at a generation  $t_k$ , under the HMM chain associated with the likelihood  
188 function previously presented in Eq. E.1:

$$\begin{aligned} Var_G^S(t_k) &= E_G^S[q(t_k)](1 - E_G^S(q(t_k))) \left[ \frac{1}{C(t_k)} + \left(1 - \frac{1}{C(t_k)}\right) \frac{1}{2N_{pool}} \right] \\ &\quad + \left(1 - \frac{1}{C(t_k)}\right) \left(1 - \frac{1}{2N_{pool}}\right) Var_{WF}^H[q(t_k)] \\ &= q(0)(1 - q(0)) \left[ \frac{1}{C(t_k)} + \left(1 - \frac{1}{C(t_k)}\right) \frac{1}{2N_{pool}} \right] \\ &\quad + \left(1 - \frac{1}{C(t_k)}\right) \left(1 - \frac{1}{2N_{pool}}\right) \sigma_G^2 t_k \end{aligned} \quad (\text{E.8})$$

$$\begin{aligned}
Var_{WF}^S(t_k) &= E_{WF}^S[q(t_k)](1 - E_{WF}^S(q(t_k))) \left[ \frac{1}{C(t_k)} + \left(1 - \frac{1}{C(t_k)}\right) \frac{1}{2N_{pool}} \right] \\
&+ \left(1 - \frac{1}{C(t_k)}\right) \left(1 - \frac{1}{2N_{pool}}\right) Var_{WF}^H[q(t_k)] \\
&= q(0)(1 - q(0)) \\
&\times \left\{ \left[ \frac{1}{C(t_k)} + \left(1 - \frac{1}{C(t_k)}\right) \frac{1}{2N_{pool}} \right] + \left(1 - \frac{1}{C(t_k)}\right) \left(1 - \frac{1}{2N_{pool}}\right) \left[ 1 - \left(1 - \frac{1}{2N}\right)^{t_k} \right] \right\}
\end{aligned}
\tag{E.9}$$

189 where  $C(t_k)$  is the total read depth at a specific sampling generation and  
190  $N_{pool}$  is the size of pool of individuals chosen for sequencing. In the case of  
191 the data used in the work presented here, 500 female flies were used for the  
192 pool [7] (see also Methods section in Main Text).

193 Given this calculation, a study was conducted of the extent to which the  
194 frequency-dependent variance observed in the data was reproduced by each  
195 model.

196  
197 Considering the experimental data, observed allele frequencies were binned  
198 according to the predicted posterior means found for each locus and time-  
199 point. Plotting the variance of the allele frequency  $q(t_{k+1})$  against the mea-  
200 sure  $q(t_k)(1 - q(t_k))$  allowed us to verify the frequency dependence predicted  
201 by each drift model, either through the analytical derivations represented  
202 in Eqs. E.8 and E.9, or through the inferred posterior variances resulting  
203 from the combined forward-backward/predict-update HMM algorithm out-  
204 lined above (Appendix E.1).

205 Given these measures, the mean squared error between the observed and  
206 inferred variances was calculated across the binned frequencies. Despite no

207 clear pattern being observed in these statistics for each replicate and chro-  
208 mosome, the Gaussian predicted variance calculated through the posterior  
209 outperforms the respective Wright-Fisher posterior model if the difference in  
210 mean squared error is summed across time-points and replicates (Figs. [E.11](#)  
211 and [E.12](#)). With respect to the variance calculated by applying the analyti-  
212 cal solutions represented in Eqs. [E.8](#) and [E.9](#), the opposite result is observed  
213 (Figs. [E.11](#) and [E.12](#)).

214 Overall, the use of the posterior variances improves the inferred values  
215 of variance when the Gaussian drift model is used, which points to the ad-  
216 vantage, in this case, of taking data into account in the HMM algorithm  
217 presented above. The same observation is not clearly verified for the Wright-  
218 Fisher model. This result contrasts with that reported in the main text  
219 where across all chromosomes and replicates the Wright-Fisher is the most  
220 representative. This further emphasizes the importance of higher distribution  
221 moments prevalent in the total likelihood approach and respective goodness-  
222 of-fit results. As stated in the Main Text, performance without trajectories  
223 reaching loss or fixation still favoured the Wright-Fisher model. Consistently  
224 with this, the results plotted in Figs. [E.10](#), [E.11](#), [E.12](#) and [E.13](#) were also  
225 found for trajectories that did not reach the frequency boundaries.

226 Curves predicted for the X chromosome are shown in Figure [E.10](#) and  
227 the respective error is presented in Fig. [E.11](#). Data for other chromosomes  
228 is shown in Fig. [E.12](#) and [E.13](#)

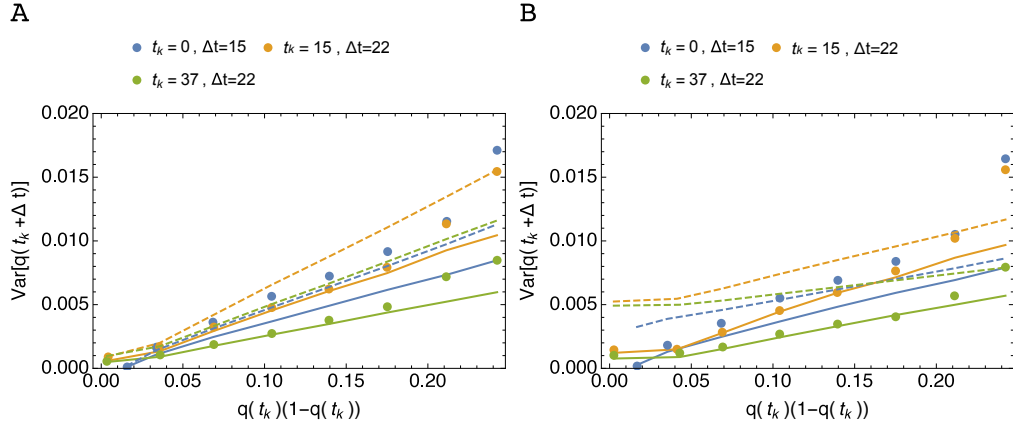

Figure E.10: **Estimates of compound distribution variance from *Drosophila* experimental evolution time-series [7] (chromosome X, replicate 1).** (A) Compound variance curves obtained with posterior means and variances (Full lines,  $WF_{post}$ ) as well as with compound variance analytical expressions (Dashed,  $WF$ ) (see Eqs. E.9 and E.8) for Wright-Fisher and (B) Gaussian drift models.

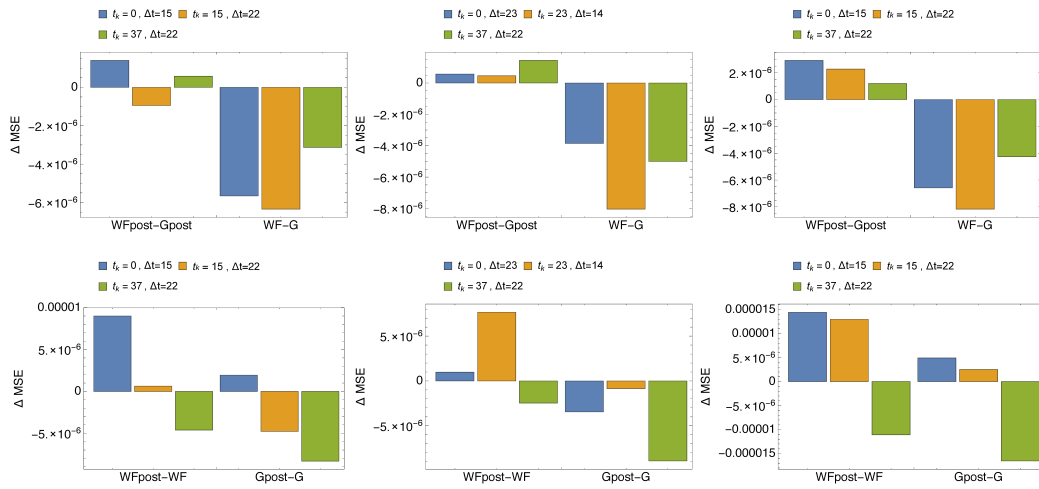

Figure E.11: Difference in mean square error in the estimates of compound distribution variance from *Drosophila* experimental evolution time-series [7] for Wright-Fisher and Gaussian models (chromosome X).  $WF_{post}, G_{post}$ : calculations with posterior variances.  $WF, G$ : Calculation with analytical solutions. From left to right: replicate 1, 2 and 3.

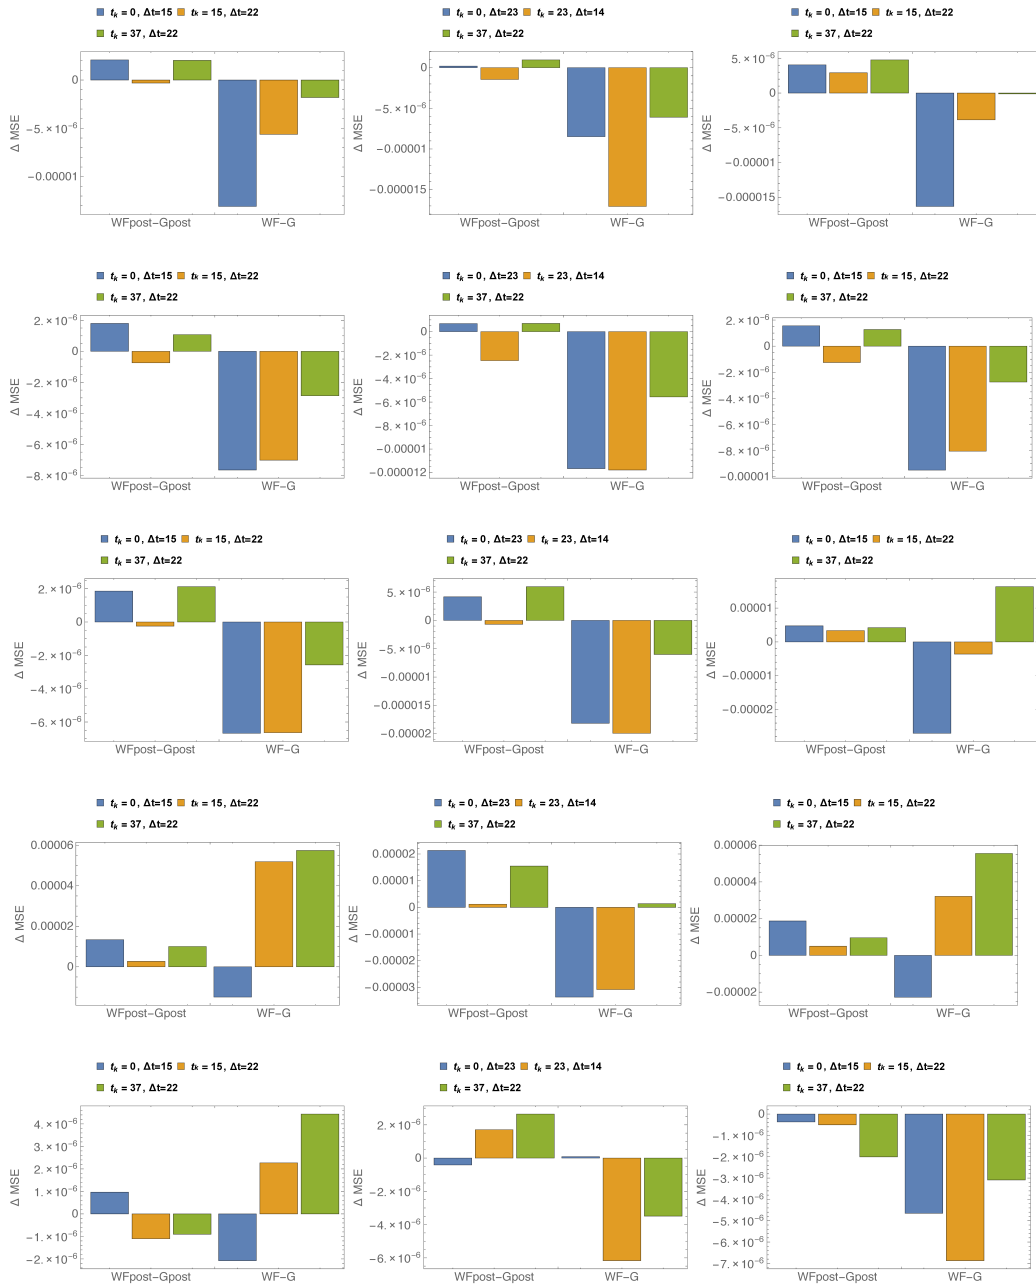

Figure E.12: Difference in mean square error in the estimates of compound distribution variance from *Drosophila* experimental evolution time-series [7] for Wright-Fisher and Gaussian models.  $WF_{post}, G_{post}$ : calculations with posterior variances.  $WF, G$ : Calculation with analytical solutions. From left to right: replicate 1, 2 and 3. From top to bottom: chromosome 2L, 2R, 3L, 3R, 4.

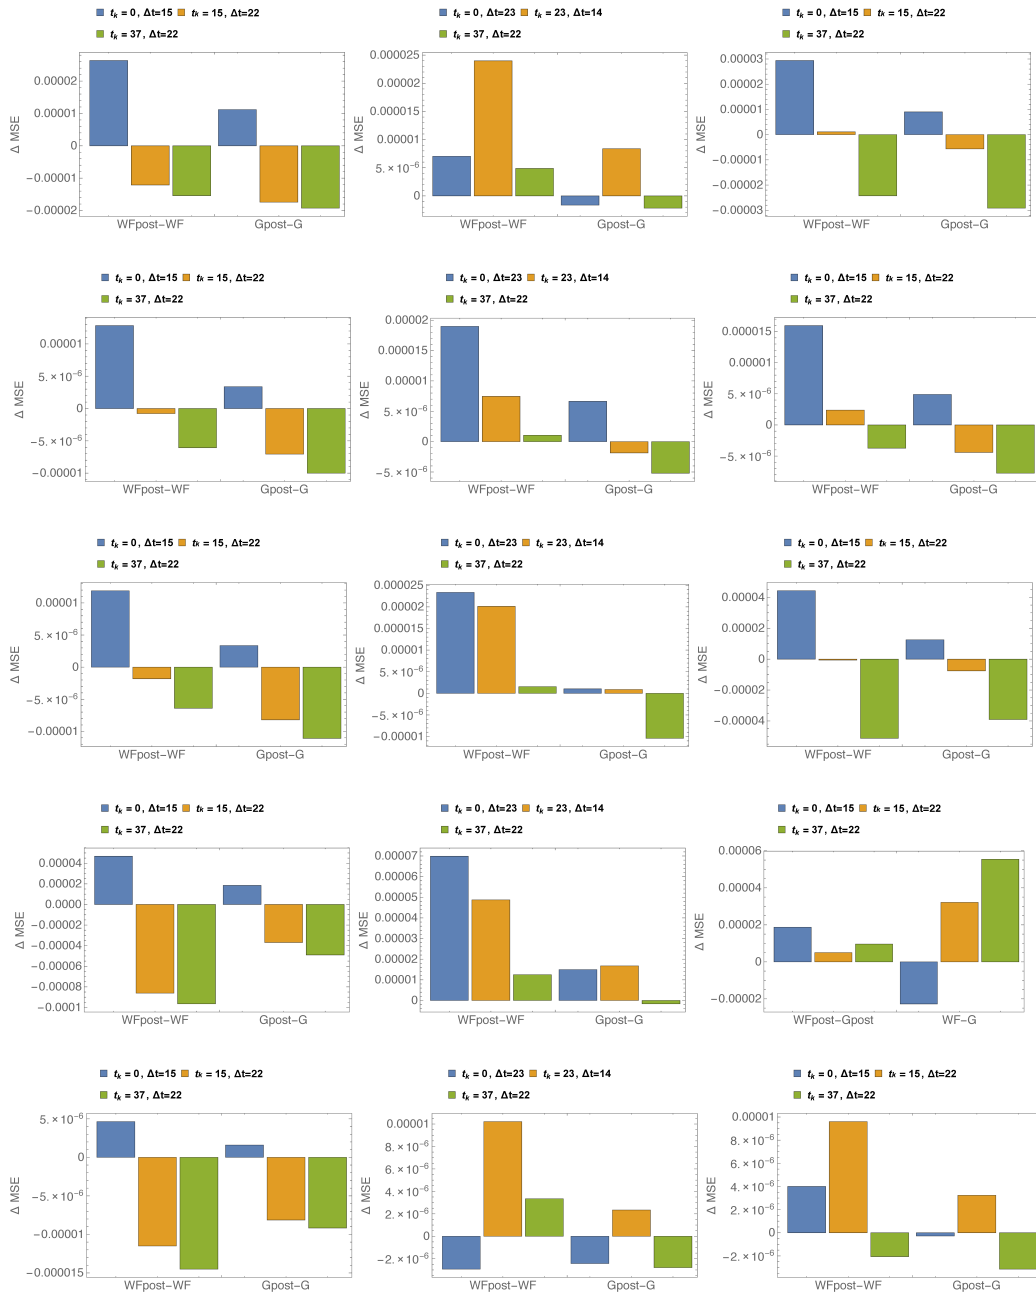

Figure E.13: Difference in mean square error between estimates of compound distribution variance from *Drosophila* experimental evolution time-series [7] obtained with posterior variances and analytical solutions.  $WF_{post}, G_{post}$ : calculations with posterior variances.  $WF, G$ : Calculation with analytical solutions. From left to right: replicate 1, 2 and 3. From top to bottom: chromosome 2L, 2R, 3L, 3R, 4.



229 **Appendix F. Frequency spectrum for experimental data**

230 The probability density functions for each chromosome collected from  
231 [7] is shown in Figs. F.14. All instants when data was collected during the  
232 experiment are presented.

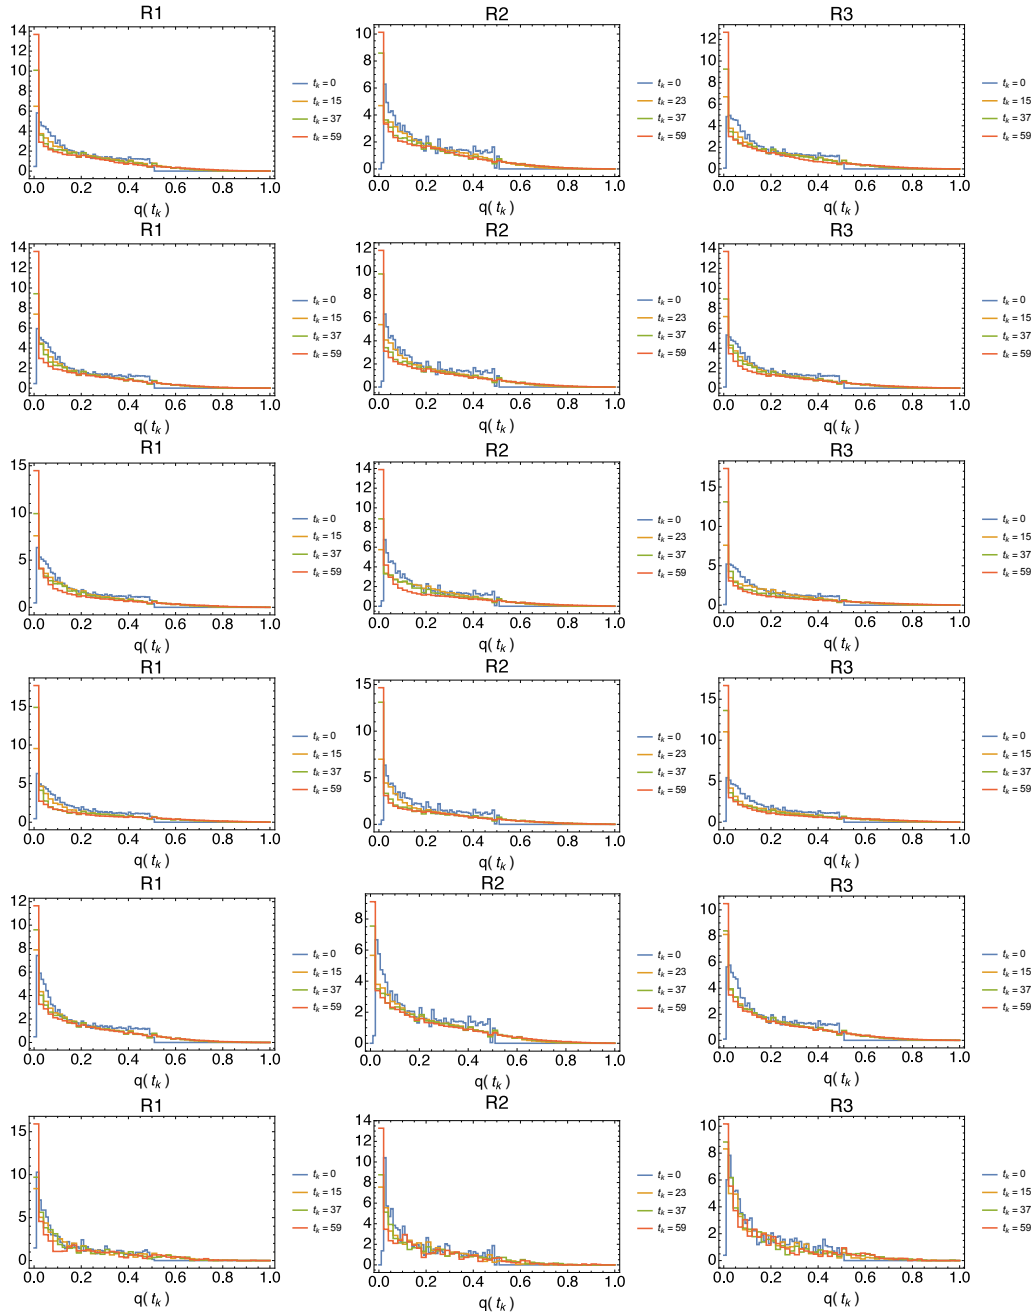

Figure F.14: **Frequency spectrum from *Drosophila* experimental evolution time-series measured by Pool-Seq [7].** From left to right: replicate *R1*, *R2* and *R3* (see Methods in Main Text). From top to bottom: chromosome *2L*, *2R*, *3L*, *3R*, *X*, *4*.

233 **References**

234 **References**

- 235 [1] R. Kofler, C. Schlitterer, A guide for the design of evolve and resequenc-  
236 ing studies, *Molecular Biology and Evolution* 31 (2) (2014) 474–483.  
237 [doi:10.1093/molbev/mst221](https://doi.org/10.1093/molbev/mst221).
- 238 [2] J. Terhorst, C. Schlitterer, Y. S. Song, Multi-locus analysis of genomic  
239 time series data from experimental evolution, *PLoS Genet* 11 (4) (2015)  
240 1–29. [doi:10.1371/journal.pgen.1005069](https://doi.org/10.1371/journal.pgen.1005069).
- 241 [3] H. Topa, Á. Jónás, R. Kofler, C. Kosiol, A. Honkela, Gaussian  
242 process test for high-throughput sequencing time series: application  
243 to experimental evolution, *Bioinformatics* 31 (11) (2015) 1762–1770.  
244 [doi:10.1093/bioinformatics/btv014](https://doi.org/10.1093/bioinformatics/btv014).
- 245 [4] L. Zhao, M. Lascoux, D. Waxman, An informational transi-  
246 tion in conditioned markov chains: Applied to genetics and evo-  
247 lution, *Journal of Theoretical Biology* 402 (2016) 158 – 170.  
248 [doi:http://dx.doi.org/10.1016/j.jtbi.2016.04.021](http://dx.doi.org/10.1016/j.jtbi.2016.04.021).
- 249 [5] H. Srensen, Parametric inference for diffusion processes observed at dis-  
250 crete points in time: A survey, *International Statistical Review / Revue*  
251 *Internationale De Statistique* 72 (3) (2004) 337–354.
- 252 [6] M. Lacerda, C. Seoighe, Population genetics inference for longitudinally-  
253 sampled mutants under strong selection, *Genetics* 198 (3) (2014) 1237–  
254 1250. [doi:10.1534/genetics.114.167957](https://doi.org/10.1534/genetics.114.167957).

- 255 [7] S. U. Franssen, V. Nolte, R. Tobler, C. Schlötterer, Patterns of link-  
256 age disequilibrium and long range hitchhiking in evolving experimental  
257 drosophila melanogaster populations, *Molecular biology and evolution*  
258 32 (2) (2015) 495–509. [doi:10.1093/molbev/msu320](https://doi.org/10.1093/molbev/msu320).
- 259 [8] I. M. Rouzine, A. Rodrigo, J. Coffin, Transition between stochastic evo-  
260 lution and deterministic evolution in the presence of selection: general  
261 theory and application to virology, *Microbiology and molecular biology*  
262 reviews 65 (1) (2001) 151–185.
- 263 [9] I. M. Rouzine, L. S. Weinberger, The quantitative theory of within-host  
264 viral evolution, *Journal of Statistical Mechanics: Theory and Experi-*  
265 *ment* 2013 (01) (2013) P01009.
- 266 [10] G. Martin, A. Lambert, A simple, semi-deterministic approximation to  
267 the distribution of selective sweeps in large populations, *Theoretical*  
268 *population biology* 101 (2015) 40–46.
- 269 [11] H. Li, W. Stephan, Inferring the demographic history and rate of adap-  
270 tive substitution in drosophila, *PLOS Genetics* 2 (10) (2006) 1–10.  
271 [doi:10.1371/journal.pgen.0020166](https://doi.org/10.1371/journal.pgen.0020166).
